# Supplementary material for: Transforming Health Care Delivery towards Value-Based Health Care in Germany: A Delphi Survey among Stakeholders
Source: MDPI journal article supplement (doi:10.3390/healthcare11081187), 2023-04-20
Supplement: s1 [file s1]

## Supplementary Materials

**Table S1.** Assessment of steps and activities regarding relevance and feasibility after round 1 of the Delphi survey.

| Items*      | Distribution                                                                                                            |    |    |    | Central tendency     |      |        | Consensus |       |          |
|-------------|-------------------------------------------------------------------------------------------------------------------------|----|----|----|----------------------|------|--------|-----------|-------|----------|
|             | a                                                                                                                       | sa | sd | d  | Mean                 | SD   | Median | Direction | Level |          |
|             | in %                                                                                                                    |    |    |    | 4-level Likert scale |      |        |           |       |          |
| Relevance   | 1: Measurement of treatment outcomes and costs for every patient                                                        |    |    |    |                      |      |        |           |       |          |
|             | Data on outcomes tangible and important to patients                                                                     | 54 | 36 | 7  | 3                    | 1,59 | 0,75   | 1         | +     | high     |
|             | Outcome data collection indication-specific                                                                             | 43 | 38 | 15 | 4                    | 1,81 | 0,85   | 2         | +     | high     |
|             | Outcome data collection standardized                                                                                    | 59 | 29 | 6  | 6                    | 1,59 | 0,85   | 1         | +     | high     |
|             | Outcome data collection integrated into daily care                                                                      | 54 | 28 | 15 | 3                    | 1,66 | 0,84   | 1         | +     | high     |
|             | Outcome data collection with valid instruments                                                                          | 57 | 38 | 3  | 1                    | 1,49 | 0,63   | 1         | +     | high     |
|             | Outcome data on short- and long-term effects of treatment course                                                        | 59 | 35 | 6  | 0                    | 1,47 | 0,61   | 1         | +     | high     |
|             | All providers publish outcome data                                                                                      | 40 | 31 | 19 | 10                   | 2,00 | 1,01   | 2         | +     | moderate |
|             | Patient-individual collection of financial resources                                                                    | 28 | 31 | 29 | 12                   | 2,25 | 1,00   | 2         |       | dissent  |
|             | Evaluation of expended financial resources by clinical and administrative staff                                         | 37 | 29 | 24 | 10                   | 2,07 | 1,01   | 2         | +     | low      |
|             | Regular team meetings on outcome data                                                                                   | 71 | 26 | 3  | 0                    | 1,32 | 0,53   | 1         | +     | high     |
|             | Regular team meetings on expended resources                                                                             | 44 | 29 | 19 | 7                    | 1,90 | 0,96   | 2         | +     | moderate |
| Feasibility | Data on outcomes tangible and important to patients                                                                     | 33 | 43 | 19 | 4                    | 1,94 | 0,84   | 2         | +     | moderate |
|             | Outcome data collection indication-specific                                                                             | 32 | 50 | 12 | 6                    | 1,91 | 0,82   | 2         | +     | high     |
|             | Outcome data collection standardized                                                                                    | 26 | 40 | 28 | 6                    | 2,13 | 0,88   | 2         | +     | low      |
|             | Outcome data collection integrated into daily care                                                                      | 16 | 19 | 51 | 13                   | 2,62 | 0,91   | 3         | -     | low      |
|             | Outcome data collection with valid instruments                                                                          | 15 | 46 | 32 | 7                    | 2,32 | 0,82   | 2         | +     | low      |
|             | Outcome data on short- and long-term effects of treatment course                                                        | 13 | 40 | 35 | 12                   | 2,46 | 0,87   | 2         |       | dissent  |
|             | All providers publish outcome data                                                                                      | 15 | 31 | 32 | 22                   | 2,62 | 0,99   | 3         |       | dissent  |
|             | Patient-individual collection of financial resources                                                                    | 15 | 32 | 32 | 21                   | 2,59 | 0,98   | 3         |       | dissent  |
|             | Evaluation of expended financial resources by clinical and administrative staff                                         | 9  | 35 | 38 | 18                   | 2,65 | 0,88   | 3         |       | dissent  |
|             | Regular team meetings on outcome data                                                                                   | 25 | 37 | 31 | 7                    | 2,21 | 0,91   | 2         | +     | low      |
|             | Regular team meetings on expended resources                                                                             | 16 | 32 | 37 | 15                   | 2,50 | 0,94   | 3         |       | dissent  |
|             | Characteristics of institution responsible for determination, collection and evaluation of treatment outcomes and costs |    |    |    |                      |      |        |           |       |          |
| Relevance   | Independent / neutral / free from conflicts of interest                                                                 | 84 | 13 | 3  | 0                    | 1,19 | 0,47   | 1         | +     | high     |
|             | Legitimate members                                                                                                      | 40 | 35 | 18 | 7                    | 1,93 | 0,94   | 2         | +     | moderate |
|             | Legally defined tasks                                                                                                   | 43 | 41 | 16 | 0                    | 1,74 | 0,73   | 2         | +     | high     |
|             | Equal representation (e.g. payers, service providers, patients)                                                         | 54 | 26 | 9  | 10                   | 1,75 | 1,00   | 1         | +     | high     |
|             | Democratically elected                                                                                                  | 18 | 29 | 32 | 21                   | 2,56 | 1,01   | 3         |       | dissent  |
|             | Interdisciplinary                                                                                                       | 69 | 26 | 4  | 0                    | 1,35 | 0,57   | 1         | +     | high     |

|                                                                             |                                                                                                             |    |    |    |    |      |      |     |   |          |
|-----------------------------------------------------------------------------|-------------------------------------------------------------------------------------------------------------|----|----|----|----|------|------|-----|---|----------|
| Feasibility                                                                 | Scientific and methodological expertise                                                                     | 59 | 38 | 3  | 0  | 1,44 | 0,56 | 1   | + | high     |
|                                                                             | Scientific-clinical expertise                                                                               | 66 | 31 | 1  | 1  | 1,38 | 0,60 | 1   | + | high     |
|                                                                             | Independent / neutral / free from conflicts of interest                                                     | 25 | 32 | 37 | 6  | 2,24 | 0,90 | 2   |   | dissent  |
|                                                                             | Legitimate members                                                                                          | 32 | 49 | 15 | 4  | 1,91 | 0,81 | 2   | + | high     |
|                                                                             | Legally defined tasks                                                                                       | 32 | 54 | 13 | 0  | 1,81 | 0,65 | 2   | + | high     |
|                                                                             | Equal representation (e.g. payers, service providers, patients)                                             | 29 | 46 | 19 | 6  | 2,01 | 0,86 | 2   | + | moderate |
|                                                                             | Democratically elected                                                                                      | 18 | 28 | 34 | 21 | 2,57 | 1,01 | 3   |   | dissent  |
|                                                                             | Interdisciplinary                                                                                           | 38 | 49 | 9  | 4  | 1,79 | 0,78 | 2   | + | high     |
|                                                                             | Scientific and methodological expertise                                                                     | 40 | 49 | 12 | 0  | 1,72 | 0,67 | 2   | + | high     |
|                                                                             | Scientific-clinical expertise                                                                               | 43 | 50 | 7  | 0  | 1,65 | 0,62 | 2   | + | high     |
| <b>2: Organization of care in integrated care facilities &amp; networks</b> |                                                                                                             |    |    |    |    |      |      |     |   |          |
| Relevance                                                                   | Multidisciplinary treatment (outpatient, inpatient & rehabilitative services)                               | 80 | 18 | 2  | 0  | 1,22 | 0,45 | 1   | + | high     |
|                                                                             | Indication-specific health care organization                                                                | 50 | 30 | 13 | 7  | 1,77 | 0,93 | 1,5 | + | high     |
|                                                                             | Health care as joint responsibility of multidisciplinary treatment team                                     | 68 | 20 | 8  | 3  | 1,47 | 0,79 | 1   | + | high     |
|                                                                             | Health care planned from the outset                                                                         | 58 | 35 | 3  | 3  | 1,52 | 0,72 | 1   | + | high     |
|                                                                             | Common management structure within a care network                                                           | 37 | 33 | 22 | 8  | 2,02 | 0,97 | 2   | + | moderate |
|                                                                             | Common scheduling system within a care network                                                              | 40 | 52 | 7  | 2  | 1,70 | 0,67 | 2   | + | high     |
|                                                                             | Joint cross-sector payment within a care network                                                            | 45 | 32 | 15 | 8  | 1,87 | 0,96 | 2   | + | moderate |
|                                                                             | Management by one team leader per patient within a care network                                             | 35 | 37 | 22 | 7  | 2,00 | 0,92 | 2   | + | moderate |
|                                                                             | Health care for each indication at one location                                                             | 10 | 20 | 48 | 22 | 2,82 | 0,89 | 3   | - | moderate |
|                                                                             | Multidisciplinary treatment (outpatient, inpatient & rehabilitative services)                               | 18 | 37 | 40 | 5  | 2,32 | 0,83 | 2   |   | dissent  |
| Feasibility                                                                 | Indication-specific health care organization                                                                | 18 | 43 | 33 | 5  | 2,25 | 0,82 | 2   | + | low      |
|                                                                             | Health care as joint responsibility of multidisciplinary treatment team                                     | 18 | 32 | 32 | 18 | 2,50 | 1,00 | 2,5 |   | dissent  |
|                                                                             | Health care planned from the outset                                                                         | 10 | 35 | 40 | 15 | 2,60 | 0,87 | 3   |   | dissent  |
|                                                                             | Common management structure within a care network                                                           | 15 | 30 | 35 | 20 | 2,60 | 0,98 | 3   |   | dissent  |
|                                                                             | Common scheduling system within a care network                                                              | 25 | 32 | 28 | 15 | 2,33 | 1,02 | 2   |   | dissent  |
|                                                                             | Joint cross-sector payment within a care network                                                            | 12 | 25 | 42 | 22 | 2,73 | 0,94 | 3   | - | low      |
|                                                                             | Management by one team leader per patient within a care network                                             | 10 | 30 | 45 | 15 | 2,65 | 0,86 | 3   | - | low      |
|                                                                             | Health care for each indication at one location                                                             | 5  | 28 | 43 | 23 | 2,85 | 0,84 | 3   | - | low      |
| <b>3: Organization of integrated service provision between facilities</b>   |                                                                                                             |    |    |    |    |      |      |     |   |          |
| Relevance                                                                   | Specific service offering of each care institution                                                          | 46 | 39 | 8  | 7  | 1,76 | 0,88 | 2   | + | high     |
|                                                                             | Disease-specific interdisciplinary providers with high treatment volume for scheduled or complex treatments | 61 | 36 | 3  | 0  | 1,42 | 0,56 | 1   | + | high     |
|                                                                             | Routine care provision at less costly sites                                                                 | 54 | 32 | 8  | 5  | 1,64 | 0,85 | 1   | + | high     |
|                                                                             | Coordinating institution for cooperation between care institutions                                          | 37 | 22 | 32 | 8  | 2,12 | 1,02 | 2   |   | dissent  |

|                                                           |                                                                                                             |    |    |    |    |      |      |     |   |          |
|-----------------------------------------------------------|-------------------------------------------------------------------------------------------------------------|----|----|----|----|------|------|-----|---|----------|
| Feasibility                                               | Specific service offering of each care institution                                                          | 22 | 34 | 34 | 10 | 2,32 | 0,94 | 2   |   | dissent  |
|                                                           | Disease-specific interdisciplinary providers with high treatment volume for scheduled or complex treatments | 29 | 47 | 19 | 5  | 2,00 | 0,83 | 2   | + | moderate |
|                                                           | Routine care provision at less costly sites                                                                 | 32 | 34 | 24 | 10 | 2,12 | 0,98 | 2   | + | low      |
|                                                           | Coordinating institution for cooperation between care institutions                                          | 15 | 25 | 39 | 20 | 2,64 | 0,98 | 3   |   | dissent  |
| <b>4: Geographic expansion of excellent forms of care</b> |                                                                                                             |    |    |    |    |      |      |     |   |          |
| Relevance                                                 | Expanding excellent forms of care rather than the catchment area                                            | 29 | 55 | 13 | 4  | 1,91 | 0,75 | 2   | + | high     |
|                                                           | Cooperations in the form of care networks                                                                   | 66 | 30 | 4  | 0  | 1,38 | 0,56 | 1   | + | high     |
|                                                           | Care institutions responsible for expansion of collaboration                                                | 23 | 27 | 36 | 14 | 2,41 | 1,01 | 2,5 |   | dissent  |
|                                                           | Rotation of individual employees between participating care facilities                                      | 39 | 38 | 18 | 5  | 1,89 | 0,89 | 2   | + | moderate |
| Feasibility                                               | Expanding excellent forms of care rather than the catchment area                                            | 14 | 48 | 30 | 7  | 2,30 | 0,81 | 2   | + | low      |
|                                                           | Cooperations in the form of care networks                                                                   | 18 | 41 | 39 | 2  | 2,25 | 0,77 | 2   |   | dissent  |
|                                                           | Care institutions responsible for expansion of collaboration                                                | 16 | 32 | 39 | 13 | 2,48 | 0,91 | 3   |   | dissent  |
|                                                           | Rotation of individual employees between participating care facilities                                      | 14 | 27 | 39 | 20 | 2,64 | 0,96 | 3   |   | dissent  |
| <b>5: Common remuneration of all treatment steps</b>      |                                                                                                             |    |    |    |    |      |      |     |   |          |
| Relevance                                                 | Inter-sectoral, risk-adjusted joint budget provided to a care network                                       | 22 | 41 | 24 | 13 | 2,28 | 0,96 | 2   | + | low      |
|                                                           | Inter-sectoral joint budget for indications with multidisciplinary treatment needs                          | 30 | 39 | 17 | 15 | 2,17 | 1,02 | 2   | + | low      |
|                                                           | Annually adjusted inter-sectoral joint budget                                                               | 39 | 37 | 11 | 13 | 1,98 | 1,02 | 2   | + | moderate |
|                                                           | Inter-sectoral joint budget based on treatment outcomes                                                     | 17 | 48 | 9  | 26 | 2,44 | 1,06 | 2   | + | low      |
|                                                           | No reimbursement of costs for preventable events                                                            | 17 | 24 | 35 | 24 | 2,67 | 1,03 | 3   |   | dissent  |
|                                                           | Additional reimbursement of costs for unavoidable events                                                    | 54 | 30 | 11 | 6  | 1,69 | 0,89 | 1   | + | high     |
| Feasibility                                               | Inter-sectoral, risk-adjusted joint budget provided to a care network                                       | 15 | 33 | 35 | 17 | 2,54 | 0,95 | 3   |   | dissent  |
|                                                           | Inter-sectoral joint budget for indications with multidisciplinary treatment needs                          | 19 | 46 | 22 | 13 | 2,30 | 0,92 | 2   | + | low      |
|                                                           | Annually adjusted inter-sectoral joint budget                                                               | 30 | 35 | 26 | 9  | 2,15 | 0,96 | 2   | + | low      |
|                                                           | Inter-sectoral joint budget based on treatment outcomes                                                     | 7  | 20 | 41 | 31 | 2,96 | 0,91 | 3   | - | moderate |
|                                                           | No reimbursement of costs for preventable events                                                            | 19 | 28 | 33 | 20 | 2,56 | 1,02 | 3   |   | dissent  |
|                                                           | Additional reimbursement of costs for unavoidable events                                                    | 41 | 26 | 20 | 13 | 2,06 | 1,07 | 2   | + | low      |
| <b>6: Establishment of an information technology</b>      |                                                                                                             |    |    |    |    |      |      |     |   |          |
| Relevance                                                 | Digital patient record for each patient                                                                     | 89 | 9  | 2  | 0  | 1,13 | 0,39 | 1   | + | high     |
|                                                           | Data relevant to care covers the entire course of treatment                                                 | 87 | 11 | 0  | 2  | 1,17 | 0,51 | 1   | + | high     |
|                                                           | Standardized structure of digital patient record                                                            | 91 | 8  | 2  | 0  | 1,11 | 0,38 | 1   | + | high     |
|                                                           | Digital patient record accessible to all providers involved in care                                         | 83 | 13 | 4  | 0  | 1,21 | 0,49 | 1   | + | high     |
|                                                           | Digital patient record as intelligent system with disease-specific recommendations                          | 64 | 25 | 8  | 4  | 1,51 | 0,80 | 1   | + | high     |

|                                |                                                                                    |    |    |    |    |      |      |   |   |          |
|--------------------------------|------------------------------------------------------------------------------------|----|----|----|----|------|------|---|---|----------|
| Feasibility                    | Digital patient record for each patient                                            | 40 | 34 | 26 | 0  | 1,87 | 0,81 | 2 | + | moderate |
|                                | Data relevant to care covers the entire course of treatment                        | 36 | 34 | 28 | 2  | 1,96 | 0,85 | 2 | + | low      |
|                                | Standardized structure of digital patient record                                   | 38 | 36 | 21 | 6  | 1,94 | 0,91 | 2 | + | moderate |
|                                | Digital patient record accessible to all providers involved in care                | 38 | 36 | 25 | 2  | 1,91 | 0,84 | 2 | + | moderate |
|                                | Digital patient record as intelligent system with disease-specific recommendations | 26 | 42 | 21 | 11 | 2,17 | 0,96 | 2 | + | low      |
| <b>7: Improve transparency</b> |                                                                                    |    |    |    |    |      |      |   |   |          |
| Relevance                      | Clear communication of responsibilities in macro-level decisions                   | 61 | 29 | 10 | 0  | 1,49 | 0,67 | 1 | + | high     |
|                                | Clear communication of decision criteria in macro-level decisions                  | 75 | 25 | 0  | 0  | 1,25 | 0,44 | 1 | + | high     |
|                                | Clear communication of data bases in macro-level decisions                         | 71 | 24 | 6  | 0  | 1,35 | 0,59 | 1 | + | high     |
|                                | Clear communication of decision-making bodies in macro-level decisions             | 65 | 27 | 8  | 0  | 1,43 | 0,64 | 1 | + | high     |
|                                | Clear communication of conflicts of interest in macro-level decisions              | 69 | 27 | 4  | 0  | 1,35 | 0,56 | 1 | + | high     |
|                                | Patient-comprehensible communication in micro-level decisions                      | 82 | 16 | 2  | 0  | 1,20 | 0,45 | 1 | + | high     |
|                                | Presentation of different treatment options to patients in micro-level decisions   | 73 | 25 | 2  | 0  | 1,29 | 0,50 | 1 | + | high     |
|                                | Structured shared decision making in micro-level decisions                         | 76 | 20 | 4  | 0  | 1,27 | 0,53 | 1 | + | high     |
|                                | Structured advice on self-management and health promotion in micro-level decisions | 75 | 20 | 6  | 0  | 1,31 | 0,58 | 1 | + | high     |
| Feasibility                    | Clear communication of responsibilities in macro-level decisions                   | 35 | 41 | 22 | 2  | 1,90 | 0,81 | 2 | + | moderate |
|                                | Clear communication of decision criteria in macro-level decisions                  | 37 | 39 | 22 | 2  | 1,88 | 0,82 | 2 | + | moderate |
|                                | Clear communication of data bases in macro-level decisions                         | 35 | 51 | 12 | 2  | 1,80 | 0,72 | 2 | + | high     |
|                                | Clear communication of decision-making bodies in macro-level decisions             | 45 | 41 | 12 | 2  | 1,71 | 0,76 | 2 | + | high     |
|                                | Clear communication of conflicts of interest in macro-level decisions              | 43 | 27 | 24 | 6  | 1,92 | 0,96 | 2 | + | moderate |
|                                | Patient-comprehensible communication in micro-level decisions                      | 47 | 43 | 10 | 0  | 1,63 | 0,66 | 2 | + | high     |
|                                | Presentation of different treatment options to patients in micro-level decisions   | 43 | 43 | 14 | 0  | 1,71 | 0,70 | 2 | + | high     |
|                                | Structured shared decision making in micro-level decisions                         | 41 | 43 | 16 | 0  | 1,75 | 0,72 | 2 | + | high     |
|                                | Structured advice on self-management and health promotion in micro-level decisions | 41 | 45 | 14 | 0  | 1,73 | 0,70 | 2 | + | high     |

\*Displayed item descriptions represent short versions, for full length see Table S3.

a = agree, sa = somewhat agree, sd = somewhat disagree, d = disagree

**Table S2:** Assessment of steps and activities regarding relevance and feasibility after round 2 of the Delphi survey.

| Items*                                          | Distribution                                                                                                            |    |    |    | Central tendency     |      |        | Consensus |         | Stability of responses |             |      |
|-------------------------------------------------|-------------------------------------------------------------------------------------------------------------------------|----|----|----|----------------------|------|--------|-----------|---------|------------------------|-------------|------|
|                                                 | a                                                                                                                       | sa | sd | d  | Mean                 | SD   | Median | Direction | Level   | Chi <sup>2</sup>       | Correlation |      |
|                                                 | in %                                                                                                                    |    |    |    | 4-level Likert scale |      |        |           |         |                        |             |      |
| Relevance                                       | 1: Measurement of treatment outcomes and costs for every patient                                                        |    |    |    |                      |      |        |           |         |                        |             |      |
|                                                 | Patient-individual collection of financial resources                                                                    | 31 | 42 | 15 | 12                   | 2,08 | 0,97   | 2         | +       | moderate               | 3,64        | 0,24 |
|                                                 | Evaluation of expended financial resources by clinical and administrative staff                                         | 42 | 37 | 15 | 6                    | 1,85 | 0,89   | 2         | +       | moderate               | 2,39        | 0,20 |
|                                                 | Outcome data collection standardized                                                                                    | 52 | 29 | 15 | 4                    | 1,71 | 0,87   | 1         | +       | high                   | 8,39        | 0,36 |
| Feasibility                                     | Outcome data collection integrated into daily care                                                                      | 52 | 29 | 15 | 4                    | 1,71 | 0,87   | 1         | +       | high                   | 26,63       | 0,60 |
|                                                 | Outcome data collection with valid instruments                                                                          | 52 | 40 | 6  | 2                    | 1,58 | 0,70   | 1         | +       | high                   | 25,15       | 0,59 |
|                                                 | Outcome data on short- and long-term effects of treatment course                                                        | 38 | 48 | 10 | 4                    | 1,79 | 0,78   | 2         | +       | high                   | 18,49       | 0,52 |
|                                                 | All providers publish outcome data                                                                                      | 37 | 31 | 27 | 6                    | 2,02 | 0,94   | 2         | +       | low                    | 11,31       | 0,42 |
|                                                 | Patient-individual collection of financial resources                                                                    | 25 | 38 | 23 | 13                   | 2,25 | 0,99   | 2         | +       | low                    | 3,69        | 0,24 |
|                                                 | Evaluation of expended financial resources by clinical and administrative staff                                         | 38 | 29 | 25 | 8                    | 2,02 | 0,98   | 2         | +       | low                    | 16,10       | 0,49 |
|                                                 | Regular team meetings on outcome data                                                                                   | 42 | 44 | 12 | 2                    | 1,73 | 0,74   | 2         | +       | high                   | 9,76        | 0,39 |
|                                                 | Regular team meetings on expended resources                                                                             | 33 | 35 | 33 | 0                    | 2,00 | 0,82   | 2         | +       | low                    | 11,28       | 0,41 |
| Feasibility                                     | Characteristics of institution responsible for determination, collection and evaluation of treatment outcomes and costs |    |    |    |                      |      |        |           |         |                        |             |      |
|                                                 | Democratically elected                                                                                                  | 33 | 25 | 27 | 15                   | 2,25 | 1,08   | 2         |         | dissent                | 3,69        | 0,24 |
|                                                 | Independent / neutral / free from conflicts of interest                                                                 | 52 | 29 | 19 | 0                    | 1,67 | 0,79   | 1         | +       | high                   | 12,11       | 0,43 |
|                                                 | Democratically elected                                                                                                  | 25 | 35 | 27 | 13                   | 2,29 | 1,00   | 2         |         | dissent                | 2,50        | 0,20 |
| Feasibility                                     | 2: Organization of care in integrated care facilities & networks                                                        |    |    |    |                      |      |        |           |         |                        |             |      |
|                                                 | Multidisciplinary treatment (outpatient, inpatient & rehabilitative services)                                           | 50 | 31 | 17 | 2                    | 1,71 | 0,82   | 1,5       | +       | high                   | 13,99       | 0,48 |
|                                                 | Indication-specific health care organization                                                                            | 44 | 42 | 13 | 2                    | 1,73 | 0,76   | 2         | +       | high                   | 11,25       | 0,43 |
|                                                 | Health care as joint responsibility of multidisciplinary treatment team                                                 | 44 | 31 | 21 | 4                    | 1,85 | 0,90   | 2         | +       | moderate               | 11,43       | 0,44 |
|                                                 | Health care planned from the outset                                                                                     | 44 | 44 | 10 | 2                    | 1,71 | 0,74   | 2         | +       | high                   | 26,17       | 0,62 |
|                                                 | Common management structure within a care network                                                                       | 29 | 31 | 27 | 13                   | 2,23 | 1,02   | 2         | +       | low                    | 3,96        | 0,27 |
|                                                 | Common scheduling system within a care network                                                                          | 40 | 42 | 10 | 8                    | 1,88 | 0,91   | 2         | +       | high                   | 7,73        | 0,37 |
|                                                 | Joint cross-sector payment within a care network                                                                        | 38 | 19 | 31 | 13                   | 2,19 | 1,08   | 2         |         | dissent                | 10,21       | 0,42 |
|                                                 | Management by one team leader per patient within a care network                                                         | 33 | 42 | 19 | 6                    | 1,98 | 0,89   | 2         | +       | moderate               | 15,51       | 0,50 |
| Health care for each indication at one location | 15                                                                                                                      | 29 | 44 | 13 | 2,54                 | 0,90 | 3      |           | dissent | 4,34                   | 0,28        |      |

|             |           |                                                                                    |    |    |    |    |      |      |   |   |          |       |      |
|-------------|-----------|------------------------------------------------------------------------------------|----|----|----|----|------|------|---|---|----------|-------|------|
| Feasibility | Relevance | <b>3: Organization of integrated service provision between facilities</b>          |    |    |    |    |      |      |   |   |          |       |      |
|             |           | Coordinating institution for cooperation between care institutions                 | 26 | 60 | 11 | 4  | 1,94 | 0,73 | 2 | + | high     | 16,74 | 0,52 |
|             |           | Specific service offering of each care institution                                 | 23 | 57 | 19 | 0  | 1,96 | 0,66 | 2 | + | high     | 10,15 | 0,42 |
|             |           | Routine care provision at less costly sites                                        | 49 | 45 | 6  | 0  | 1,57 | 0,62 | 2 | + | high     | 12,32 | 0,46 |
|             |           | Coordinating institution for cooperation between care institutions                 | 23 | 45 | 21 | 11 | 2,19 | 0,92 | 2 | + | low      | 7,95  | 0,37 |
| Feasibility | Relevance | <b>4: Geographic expansion of excellent forms of care</b>                          |    |    |    |    |      |      |   |   |          |       |      |
|             |           | Care institutions responsible for expansion of collaboration                       | 30 | 34 | 30 | 6  | 2,13 | 0,92 | 2 | + | low      | 2,63  | 0,22 |
|             |           | Expanding excellent forms of care rather than the catchment area                   | 21 | 45 | 30 | 4  | 2,17 | 0,82 | 2 | + | low      | 1,15  | 0,15 |
|             |           | Cooperations in the form of care networks                                          | 49 | 36 | 11 | 4  | 1,70 | 0,83 | 2 | + | high     | 16,40 | 0,52 |
|             |           | Care institutions responsible for expansion of collaboration                       | 26 | 28 | 38 | 9  | 2,30 | 0,95 | 2 |   | dissent  | 1,68  | 0,18 |
| Feasibility | Relevance | Rotation of individual employees between participating care facilities             | 34 | 28 | 34 | 4  | 2,09 | 0,93 | 2 | + | low      | 9,27  | 0,41 |
|             |           | <b>5: Common remuneration of all treatment steps</b>                               |    |    |    |    |      |      |   |   |          |       |      |
|             |           | Inter-sectoral, risk-adjusted joint budget provided to a care network              | 20 | 53 | 24 | 2  | 2,09 | 0,73 | 2 | + | moderate | 4,40  | 0,29 |
|             |           | Inter-sectoral joint budget for indications with multidisciplinary treatment needs | 31 | 44 | 22 | 2  | 1,96 | 0,80 | 2 | + | moderate | 4,88  | 0,31 |
|             |           | Inter-sectoral joint budget based on treatment outcomes                            | 27 | 29 | 42 | 2  | 2,20 | 0,87 | 2 |   | dissent  | 23,57 | 0,62 |
| Feasibility | Relevance | No reimbursement of costs for preventable events                                   | 13 | 40 | 36 | 11 | 2,44 | 0,87 | 2 |   | dissent  | 4,44  | 0,29 |
|             |           | Inter-sectoral, risk-adjusted joint budget provided to a care network              | 18 | 33 | 38 | 11 | 2,42 | 0,92 | 2 |   | dissent  | 0,71  | 0,12 |
|             |           | Inter-sectoral joint budget for indications with multidisciplinary treatment needs | 31 | 51 | 16 | 2  | 1,89 | 0,75 | 2 | + | high     | 5,80  | 0,33 |
|             |           | Annually adjusted inter-sectoral joint budget                                      | 36 | 31 | 29 | 4  | 2,02 | 0,92 | 2 | + | low      | 1,27  | 0,16 |
|             |           | No reimbursement of costs for preventable events                                   | 18 | 33 | 33 | 16 | 2,47 | 0,97 | 2 |   | dissent  | 0,57  | 0,11 |
| Feasibility | Relevance | Additional reimbursement of costs for unavoidable events                           | 47 | 38 | 13 | 2  | 1,71 | 0,79 | 2 | + | high     | 5,51  | 0,32 |
|             |           | <b>6: Establishment of an information technology</b>                               |    |    |    |    |      |      |   |   |          |       |      |
|             |           | Data relevant to care covers the entire course of treatment                        | 59 | 25 | 14 | 2  | 1,59 | 0,82 | 1 | + | high     | 5,85  | 0,34 |
| Feasibility | Relevance | Digital patient record as intelligent system with disease-specific recommendations | 52 | 34 | 9  | 5  | 1,66 | 0,83 | 1 | + | high     | 8,01  | 0,39 |

\*Displayed item descriptions represent short versions, for full length see Table S3.

a = agree, sa = somewhat agree, sd = somewhat disagree, d = disagree

**Table S3:** Survey questions in German, English and short English form. Participants were asked to rate the relevance as well as feasibility of each statement.

| No.  | Item in German                                                                                                                                                                                                                                                         | Item in English                                                                                                                                                                                                       | Short English form                                                              |
|------|------------------------------------------------------------------------------------------------------------------------------------------------------------------------------------------------------------------------------------------------------------------------|-----------------------------------------------------------------------------------------------------------------------------------------------------------------------------------------------------------------------|---------------------------------------------------------------------------------|
| 1.1  | Die Datenerhebung zu Behandlungsergebnissen sollte hauptsächlich für Patient*innen spürbare und wichtige Behandlungsergebnisse (z.B. Schmerzen, Funktionsfähigkeit, Rezidiv) zur Beurteilung der tatsächlichen Auswirkungen der gesundheitlichen Versorgung, umfassen. | Data collection on treatment outcomes should primarily include treatment outcomes that are tangible and important to patients (e.g., pain, functional capacity, recurrence) to assess the true impact of health care. | Data on outcomes tangible and important to patients                             |
| 1.2  | Die Datenerhebung zu Behandlungsergebnissen sollte immer indikationsspezifisch erfolgen.                                                                                                                                                                               | Data collection on treatment outcomes should always be indication specific.                                                                                                                                           | Outcome data collection indication-specific                                     |
| 1.3  | Die Datenerhebung zu Behandlungsergebnissen sollte immer standardisiert erfolgen (d.h. mit festgelegten Verfahren zu festgelegten Zeitpunkten).                                                                                                                        | Data collection on treatment outcomes should always be standardized (i.e., using established procedures at established time points).                                                                                  | Outcome data collection standardized                                            |
| 1.4  | Die Datenerhebung zu Behandlungsergebnissen sollte bei allen Patient*innen in den Versorgungsalltag integriert werden.                                                                                                                                                 | Data collection on treatment outcomes should be integrated into the daily care of all patients.                                                                                                                       | Outcome data collection integrated into daily care                              |
| 1.5  | Die Datenerhebung zu Behandlungsergebnissen sollte nur mit validen Instrumenten durchgeführt werden.                                                                                                                                                                   | Data collection on treatment outcomes should be conducted only with valid instruments.                                                                                                                                | Outcome data collection with valid instruments                                  |
| 1.6  | Die Daten zu Behandlungsergebnissen sollten kurz- und langfristige Auswirkungen der gesundheitlichen Versorgung wiederholt über den gesamten Behandlungsverlauf abbilden.                                                                                              | Treatment outcome data should reflect short- and long-term effects of health care repeatedly throughout the course of treatment.                                                                                      | Outcome data on short- and long-term effects of treatment course                |
| 1.7  | Die Daten zu Behandlungsergebnissen sollten von jeder Versorgungseinrichtung veröffentlicht werden.                                                                                                                                                                    | Treatment outcome data should be published by each care provider.                                                                                                                                                     | All providers publish outcome data                                              |
| 1.8  | Die aufgewendeten finanziellen Ressourcen der Versorgung sollten für alle Patient*innen einzeln erhoben werden.                                                                                                                                                        | The financial resources spent on care should be collected individually for all patients.                                                                                                                              | Patient-individual collection of financial resources expended                   |
| 1.9  | Die aufgewendeten finanziellen Ressourcen der Versorgung sollten gemeinsam von klinischem und administrativem Personal bewertet werden.                                                                                                                                | Financial resources of care expended should be evaluated jointly by clinical and administrative staff.                                                                                                                | Evaluation of expended financial resources by clinical and administrative staff |
| 1.10 | Es sollten regelmäßige Teambesprechungen zu den Daten über Behandlungsergebnisse stattfinden.                                                                                                                                                                          | There should be regular team meetings on treatment outcome data.                                                                                                                                                      | Regular team meetings on outcome data                                           |
| 1.11 | Es sollten regelmäßige Teambesprechungen zu den Daten über aufgewendete Ressourcen stattfinden.                                                                                                                                                                        | There should be regular team meetings regarding data on resources expended.                                                                                                                                           | Regular team meetings on expended resources                                     |
| 1.12 | Unabhängig / neutral / frei von Interessenkonflikten                                                                                                                                                                                                                   | Independent / neutral / free from conflicts of interest                                                                                                                                                               | Independent / neutral / free from conflicts of interest                         |

|             |                                                                                                                                                                                              |                                                                                                                                                                              |                                                                               |
|-------------|----------------------------------------------------------------------------------------------------------------------------------------------------------------------------------------------|------------------------------------------------------------------------------------------------------------------------------------------------------------------------------|-------------------------------------------------------------------------------|
| <b>1.13</b> | Gesetzlich legitimierte Mitglieder                                                                                                                                                           | Legitimate members                                                                                                                                                           | Legitimate members                                                            |
| <b>1.14</b> | Gesetzlich definierte Aufgaben                                                                                                                                                               | Legally defined tasks                                                                                                                                                        | Legally defined tasks                                                         |
| <b>1.15</b> | Paritätisch besetzt (z.B. Kostenträger, Leistungserbringende, Patient*innen)                                                                                                                 | Equal representation (e.g. payers, service providers, patients)                                                                                                              | Equal representation (e.g. payers, service providers, patients)               |
| <b>1.16</b> | Demokratisch gewählt                                                                                                                                                                         | Democratically elected                                                                                                                                                       | Democratically elected                                                        |
| <b>1.17</b> | Interdisziplinär (z.B. verschiedene fachlich relevante Leistungserbringende für die Fragestellung, Wissenschaftler*innen)                                                                    | Interdisciplinary (e.g. different relevant service providers for the question, scientists)                                                                                   | Interdisciplinary                                                             |
| <b>1.18</b> | Wissenschaftlich-methodische Expertise                                                                                                                                                       | Scientific and methodological expertise                                                                                                                                      | Scientific and methodological expertise                                       |
| <b>1.19</b> | Wissenschaftlich-klinische Expertise                                                                                                                                                         | Scientific-clinical expertise                                                                                                                                                | Scientific-clinical expertise                                                 |
| <b>2.1</b>  | Die gesundheitliche Versorgung durch ein multidisziplinäres Behandlungsteam sollte ambulante, stationäre und rehabilitative Versorgungsleistungen umfassen.                                  | Health care provided by a multidisciplinary treatment team should include outpatient, inpatient, and rehabilitative care services.                                           | Multidisciplinary treatment (outpatient, inpatient & rehabilitative services) |
| <b>2.2</b>  | Die gesundheitliche Versorgung sollte an Hand von indikationsspezifischen Behandlungsverläufen organisiert werden, d.h. nicht auf Grundlage einzelner Versorgungsleistungen.                 | Health care should be organized on the basis of indication-specific treatment pathways, i.e. not on the basis of individual care services.                                   | Indication-specific health care organization                                  |
| <b>2.3</b>  | Die gesundheitliche Versorgung sollte gemeinsam durch das multidisziplinäre Behandlungsteam verantwortet werden.                                                                             | Health care should be the joint responsibility of the multidisciplinary treatment team.                                                                                      | Health care as joint responsibility of multidisciplinary treatment team       |
| <b>2.4</b>  | Die gesundheitliche Versorgung sollte von vornherein umfassend geplant werden und u.a. präventive, diagnostische, therapeutische, rehabilitative oder palliative Leistungen berücksichtigen. | Health care should be planned comprehensively from the outset, taking into account preventive, diagnostic, therapeutic, rehabilitative or palliative services, among others. | Health care planned from the outset                                           |
| <b>2.5</b>  | Die gesundheitliche Versorgung sollte innerhalb eines Versorgungsnetzwerkes durch eine gemeinsame Verwaltungsstruktur umgesetzt werden.                                                      | Health care should be implemented within a care network through a common management structure.                                                                               | Common management structure within a care network                             |
| <b>2.6</b>  | Die gesundheitliche Versorgung sollte innerhalb eines Versorgungsnetzwerkes durch eine gemeinsame Terminplanungsstruktur umgesetzt werden.                                                   | Health care should be implemented within a care network through a common scheduling structure.                                                                               | Common scheduling system within a care network                                |
| <b>2.7</b>  | Die gesundheitliche Versorgung sollte innerhalb eines Versorgungsnetzwerkes durch eine gemeinsame sektorenübergreifenden Vergütung finanziert werden.                                        | Health care should be financed within a care network through joint cross-sector payment.                                                                                     | Joint cross-sector payment within a care network                              |
| <b>2.8</b>  | Die gesundheitliche Versorgung sollte innerhalb eines Versorgungsnetzwerkes von einer Teamleitung je Patient*in betreut werden.                                                              | Health care should be managed by one team leader per patient within a care network.                                                                                          | Management by one team leader per patient within a care network               |
| <b>2.9</b>  | Die gesundheitliche Versorgung sollte innerhalb eines Versorgungsnetzwerkes für jede Indikation möglichst an einem Standort erbracht werden.                                                 | Health care should be provided within a care network for each indication at one location, if possible.                                                                       | Health care for each indication at one location                               |



|            |                                                                                                                                                                                                                                                  |                                                                                                                                                                                                                 |                                                                                                             |
|------------|--------------------------------------------------------------------------------------------------------------------------------------------------------------------------------------------------------------------------------------------------|-----------------------------------------------------------------------------------------------------------------------------------------------------------------------------------------------------------------|-------------------------------------------------------------------------------------------------------------|
| <b>3.1</b> | Jede Versorgungseinrichtung sollte ein spezifisches Leistungsangebot festlegen, d.h. die Versorgung in den ausgewählten Bereichen verbessern und bestimmte Leistungen dafür nicht anbieten.                                                      | Each care institution should establish a specific service offering, i.e., improve care in the selected areas and not offer certain services in return.                                                          | Specific service offering of each care institution                                                          |
| <b>3.2</b> | Planbare oder komplexe Behandlungen (z.B. chirurgische Eingriffe bei Prostatakrebs) sollten von einer begrenzten Anzahl erkrankungsspezifischer interdisziplinärer Versorgungseinrichtungen mit einem hohen Behandlungsvolumen umgesetzt werden. | Scheduled or complex treatments (e.g., surgical procedures for prostate cancer) should be implemented by a limited number of disease-specific interdisciplinary care providers with a high volume of treatment. | Disease-specific interdisciplinary providers with high treatment volume for scheduled or complex treatments |
| <b>3.3</b> | Weniger komplexe Behandlungen und Routinebehandlungen sollten an weniger kostenintensiven Standorten außerhalb von Universitätskliniken erbracht werden.                                                                                         | Less complex treatments and routine care should be provided at less costly sites outside of university hospitals.                                                                                               | Routine care provision at less costly sites                                                                 |
| <b>3.4</b> | Eine koordinierende Einrichtung sollte die Zusammenarbeit aller beteiligten Versorgungseinrichtungen zentral planen.                                                                                                                             | A coordinating institution should centrally plan the cooperation of all participating care institutions.                                                                                                        | Coordinating institution for cooperation between care institutions                                          |
| <b>4.1</b> | Der Fokus sollte auf der Ausweitung exzellenter Versorgungsformen anstelle der Ausweitung des Einzugsgebiets eines Versorgungsnetzwerks liegen.                                                                                                  | The focus should be on expanding excellent forms of care rather than expanding the catchment area of a care network.                                                                                            | Expanding excellent forms of care rather than the catchment area                                            |
| <b>4.2</b> | Zur Förderung exzellenter Versorgung sollten Kooperationen, in Form von Versorgungsnetzwerken, zwischen z.B. niedergelassenen Praxen, Krankenhäusern der Grund- und Regelversorgung sowie überregionalen Kliniken gebildet werden.               | In order to promote excellent care, cooperations in the form of care networks should be formed between, for example, private practices, hospitals providing basic and standard care, and supraregional clinics. | Cooperations in the form of care networks                                                                   |
| <b>4.3</b> | Die Ausweitung von Kooperationen innerhalb der Versorgungsnetzwerke sollte in Eigenverantwortung der beteiligten Versorgungseinrichtungen erfolgen.                                                                                              | The expansion of collaborations within the care networks should be the responsibility of the participating care institutions.                                                                                   | Care institutions responsible for expansion of collaboration                                                |
| <b>4.4</b> | Einzelne Mitarbeitende des Versorgungsnetzwerks sollten regelmäßig zwischen den beteiligten Versorgungseinrichtungen wechseln, um den fachlichen Austausch und Zusammenhalt innerhalb des Netzwerks zu fördern.                                  | Individual employees of the care network should regularly rotate between the participating care facilities in order to promote professional exchange and cohesion within the network.                           | Rotation of individual employees between participating care facilities                                      |
| <b>5.1</b> | Das sektorenübergreifende gemeinsames Budget sollte risikoadjustiert an ein Versorgungsnetzwerk erfolgen.                                                                                                                                        | The inter-sectoral joint budget should be risk-adjusted to a network of care.                                                                                                                                   | Inter-sectoral, risk-adjusted joint budget to a care network                                                |
| <b>5.2</b> | Das sektorenübergreifende gemeinsames Budget sollte insbesondere für spezifische Indikationen mit multidisziplinärem Behandlungsbedarf (z.B. chronische Erkrankungen) eingeführt werden.                                                         | The inter-sectoral joint budget should be introduced in particular for specific indications with multidisciplinary treatment needs (e.g., chronic diseases).                                                    | Inter-sectoral joint budget for indications with multidisciplinary treatment needs                          |
| <b>5.3</b> | Das sektorenübergreifende gemeinsames Budget sollte jährlich angepasst ausgezahlt werden.                                                                                                                                                        | The inter-sectoral joint budget should be disbursed on an annually adjusted basis.                                                                                                                              | Annually adjusted inter-sectoral joint budget                                                               |

|     |                                                                                                                                                                                                        |                                                                                                                                                                                                |                                                                                    |
|-----|--------------------------------------------------------------------------------------------------------------------------------------------------------------------------------------------------------|------------------------------------------------------------------------------------------------------------------------------------------------------------------------------------------------|------------------------------------------------------------------------------------|
| 5.4 | Das sektorenübergreifende gemeinsame Budget sollte sich hauptsächlich nach den erreichten Behandlungsergebnissen der Patient*innen richten, d.h. höhere Vergütungen für bessere Behandlungsergebnisse. | The inter-sectoral joint budget should be based primarily on the treatment outcomes achieved by patients, i.e. higher reimbursements for better treatment outcomes.                            | Inter-sectoral joint budget based on treatment outcomes                            |
| 5.5 | Zusätzliche Behandlungskosten für vermeidbare Ereignisse (z.B. Wundinfektion nach Operation), sollten nicht zusätzlich vergütet werden.                                                                | Additional treatment costs for preventable events (e.g., wound infection after surgery), should not be reimbursed additionally.                                                                | No reimbursement of costs for preventable events                                   |
| 5.6 | Zusätzliche Behandlungskosten für unvermeidbare Ereignisse sollten zusätzlich vergütet werden.                                                                                                         | Additional treatment costs for unavoidable events should be reimbursed additionally.                                                                                                           | Additional reimbursement of costs for unavoidable events                           |
| 6.1 | Versorgungsrelevante Daten sollten für jede*n einzelne*n Patient*in in einer digitalen Patient*innenakte erfasst werden.                                                                               | Data relevant to the provision of care should be recorded in a digital patient record for each individual patient.                                                                             | Digital patient record for each patient                                            |
| 6.2 | Versorgungsrelevante Daten sollten den gesamten Behandlungsverlauf umfassen, d.h. relevante Anamnesedaten sowie diagnostische und therapeutische Informationen beinhalten.                             | Data relevant to care should cover the entire course of treatment, i.e., include relevant medical history data as well as diagnostic and therapeutic information.                              | Data relevant to care cover the entire course of treatment                         |
| 6.3 | Die digitale Patient*innenakte sollte eine standardisierte Datenstruktur und -eingabe haben, um eine einrichtungsübergreifende Zusammenarbeit zu ermöglichen.                                          | The digital patient record should have a standardized data structure and input to enable collaboration across institutions.                                                                    | Standardized structure of digital patient record                                   |
| 6.4 | Die digitale Patient*innenakte sollte für alle an der gesundheitlichen Versorgung beteiligten Leistungserbringenden zugänglich sein.                                                                   | The digital patient record should be accessible to all service providers involved in health care.                                                                                              | Digital patient record accessible to all providers involved in care                |
| 6.5 | Die digitale Patient*innenakte sollte ein intelligentes System sein, welches krankheitsspezifische Empfehlungen gibt (z.B. automatisierter Hinweis auf weitere Diagnostik bei auffälligem Blutbild).   | The digital patient file should be an intelligent system that provides disease-specific recommendations (e.g. automated indication of further diagnostics in the case of abnormal blood work). | Digital patient record as intelligent system with disease-specific recommendations |
| 7.1 | Um Transparenz bei Entscheidungen auf Makroebene (z.B. Krankenhausplanung, Vergütungs- und Erstattungsregelungen) zu verbessern, sollten Verantwortlichkeiten klarer kommuniziert werden.              | To improve transparency in macro-level decisions (e.g., hospital planning, payment and reimbursement arrangements), responsibilities should be more clearly communicated.                      | Clear communication of responsibilities in macro-level decisions                   |
| 7.2 | Um Transparenz bei Entscheidungen auf Makroebene (z.B. Krankenhausplanung, Vergütungs- und Erstattungsregelungen) zu verbessern, sollten Entscheidungskriterien klarer kommuniziert werden.            | To improve transparency in macro-level decisions (e.g., hospital planning, payment and reimbursement arrangements), decision criteria should be communicated more clearly.                     | Clear communication of decision criteria in macro-level decisions                  |
| 7.3 | Um Transparenz bei Entscheidungen auf Makroebene (z.B. Krankenhausplanung, Vergütungs- und Erstattungsregelungen) zu verbessern, sollten Datengrundlagen klarer kommuniziert werden.                   | To improve transparency in macro-level decisions (e.g., hospital planning, payment and reimbursement regulations), data bases should be communicated more clearly.                             | Clear communication of data bases in macro-level decisions                         |

|            |                                                                                                                                                                                                                                                                                             |                                                                                                                                                                                                                                                                                                    |                                                                                    |
|------------|---------------------------------------------------------------------------------------------------------------------------------------------------------------------------------------------------------------------------------------------------------------------------------------------|----------------------------------------------------------------------------------------------------------------------------------------------------------------------------------------------------------------------------------------------------------------------------------------------------|------------------------------------------------------------------------------------|
| <b>7.4</b> | Um Transparenz bei Entscheidungen auf Makroebene (z.B. Krankenhausplanung, Vergütungs- und Erstattungsregelungen) zu verbessern, sollten die Besetzung von Entscheidungsgremien, d.h. die darin vertretenen Interessensgruppen mit ihren Einflussmöglichkeiten, klarer kommuniziert werden. | To improve transparency in macro-level decisions (e.g., hospital planning, remuneration and reimbursement regulations), the composition of decision-making bodies, i.e., the interest groups represented in them with their opportunities to exert influence, should be communicated more clearly. | Clear communication of decision-making bodies in macro-level decisions             |
| <b>7.5</b> | Um Transparenz bei Entscheidungen auf Makroebene (z.B. Krankenhausplanung, Vergütungs- und Erstattungsregelungen) zu verbessern, sollten mögliche Interessenskonflikte klarer kommuniziert werden.                                                                                          | To improve transparency in macro-level decisions (e.g., hospital planning, payment and reimbursement regulations), potential conflicts of interest should be communicated more clearly.                                                                                                            | Clear communication of conflicts of interest in macro-level decisions              |
| <b>7.6</b> | Um Transparenz bei Entscheidungen auf Mikroebene (Interaktion zwischen Patient*innen und Kontaktpersonen in Versorgungseinrichtungen) zu verbessern, sollten individuelle Therapieempfehlungen für Patient*innen verständlicher kommuniziert werden.                                        | In order to improve transparency in micro-level decision-making (interaction between patients and contacts in care facilities), individual therapy recommendations should be communicated in a way that is more comprehensible to patients.                                                        | Patient-comprehensible communication in micro-level decisions                      |
| <b>7.7</b> | Um Transparenz bei Entscheidungen auf Mikroebene (Interaktion zwischen Patient*innen und Kontaktpersonen in Versorgungseinrichtungen) zu verbessern, sollten verschiedenen Behandlungsoptionen für Patient*innen regelhaft aufgezeigt werden.                                               | In order to improve transparency in micro-level decision-making (interaction between patients and contacts in care facilities), different treatment options should be regularly presented to patients.                                                                                             | Presentation of different treatment options to patients in micro-level decisions   |
| <b>7.8</b> | Um Transparenz bei Entscheidungen auf Mikroebene (Interaktion zwischen Patient*innen und Kontaktpersonen in Versorgungseinrichtungen) zu verbessern, sollten Patient*innen strukturierter in gemeinsame Behandlungsentscheidungen eingebunden werden.                                       | To improve transparency in micro-level decisions (interaction between patients and contacts in care settings), patients should be involved in shared treatment decisions in a more structured way.                                                                                                 | Structured shared decision making in micro-level decisions                         |
| <b>7.9</b> | Um Transparenz bei Entscheidungen auf Mikroebene (Interaktion zwischen Patient*innen und Kontaktpersonen in Versorgungseinrichtungen) zu verbessern, sollten Patient*innen zu Selbstmanagement und gesundheitsförderlichen Verhaltensweisen strukturierter beraten werden.                  | To improve transparency in micro-level decision-making (interaction between patients and contacts in care settings), patients should receive more structured advice on self-management and health-promoting behaviors.                                                                             | Structured advice on self-management and health promotion in micro-level decisions |
